# Supplementary material for: Analysis of circulating tumour cell and the epithelial mesenchymal transition (EMT) status during eribulin-based treatment in 22 patients with metastatic breast cancer: a pilot study
Source: Springer Nature journal article supplement (doi:10.1186/s12967-018-1663-8), 2018-10-20
Supplement: MOESM1 [file 16214844]

**Table S1. Number of CTCs according to intrinsic subtype**

| Intrinsic subtype | n  | Number of total CTCs (range)* | Number of mCTCs (range)* | Proportion of mCTCs* |
|-------------------|----|-------------------------------|--------------------------|----------------------|
| Luminal-HER2(-)   | 13 | 3.0 (0-18)                    | 0.0 (0-18)               | 10%**                |
| Luminal-HER2(+)   | 3  | 3.0 (2-3)                     | 1.0 (0-3)                | 33%                  |
| HER2              | 1  | 1                             | 0                        | 0%                   |
| Triple negative   | 5  | 4.0 (1-17)                    | 3.0 (1-8)                | 100%**               |

\*median values, \*\*p<0.05
