# Supplementary material for: Analysis of circulating tumour cell and the epithelial mesenchymal transition (EMT) status during eribulin-based treatment in 22 patients with metastatic breast cancer: a pilot study
Source: Springer Nature journal article supplement (doi:10.1186/s12967-018-1663-8), 2018-10-20
Supplement: MOESM2 [file 16214844]

**Table S2. Univariate analysis of factors related to long PFS**

|                       |              | PFS≥6mos | PFS<6mos | P-value       |
|-----------------------|--------------|----------|----------|---------------|
| n                     |              | 5        | 15       |               |
| Age                   |              |          |          | n.s.          |
|                       | 55 or less   | 2        | 7        |               |
|                       | >55          | 3        | 8        |               |
| Histology             |              |          |          | n.s.          |
|                       | IDC (NST)    | 4        | 9        |               |
|                       | Others       | 1        | 6        |               |
| Grade                 |              |          |          | n.s.          |
|                       | High         | 1        | 4        |               |
|                       | Low          | 3        | 8        |               |
|                       | Unknown      | 1        | 3        |               |
| Ly                    |              |          |          | n.s.          |
|                       | Positive     | 5        | 4        |               |
|                       | Negative     | 0        | 5        |               |
|                       | Unknown      | 0        | 6        |               |
| ER                    |              |          |          | n.s.          |
|                       | Positive     | 3        | 11       |               |
|                       | Negative     | 2        | 4        |               |
| PgR                   |              |          |          | n.s.          |
|                       | Positive     | 3        | 10       |               |
|                       | Negative     | 2        | 5        |               |
| HER2                  |              |          |          | n.s.          |
|                       | Positive     | 2        | 1        |               |
|                       | Negative     | 3        | 14       |               |
| StageIV               |              |          |          | n.s.          |
|                       | Yes          | 0        | 5        |               |
|                       | No           | 5        | 10       |               |
| DFS (months)          |              |          |          | <b>0.044</b>  |
|                       | 60 or longer | 5        | 4        |               |
|                       | <60          | 0        | 6        |               |
| Visceral metastasis   |              |          |          | n.s.          |
|                       | Yes          | 3        | 12       |               |
|                       | No           | 2        | 3        |               |
| Total CTCs            |              |          |          | <b>0.0014</b> |
|                       | 3 or more    | 0        | 13       |               |
|                       | <3           | 5        | 2        |               |
| mCTC                  |              |          |          | <b>0.038</b>  |
|                       | 2 or more    | 0        | 9        |               |
|                       | <2           | 5        | 6        |               |
| eCTC                  |              |          |          | n.s.          |
|                       | 2 or more    | 2        | 9        |               |
|                       | <2           | 3        | 6        |               |
| Eribulin as 1st chemo |              |          |          | n.s.          |
|                       | Yes          | 2        | 5        |               |
|                       | No           | 3        | 10       |               |
